# Supplementary material
Source: HighWire-hosted journal article supplement (https://svn.bmj.com/content/8/3/181)
Supplement: inline-supplementary-material-1 [file inline-supplementary-material-1.pdf]

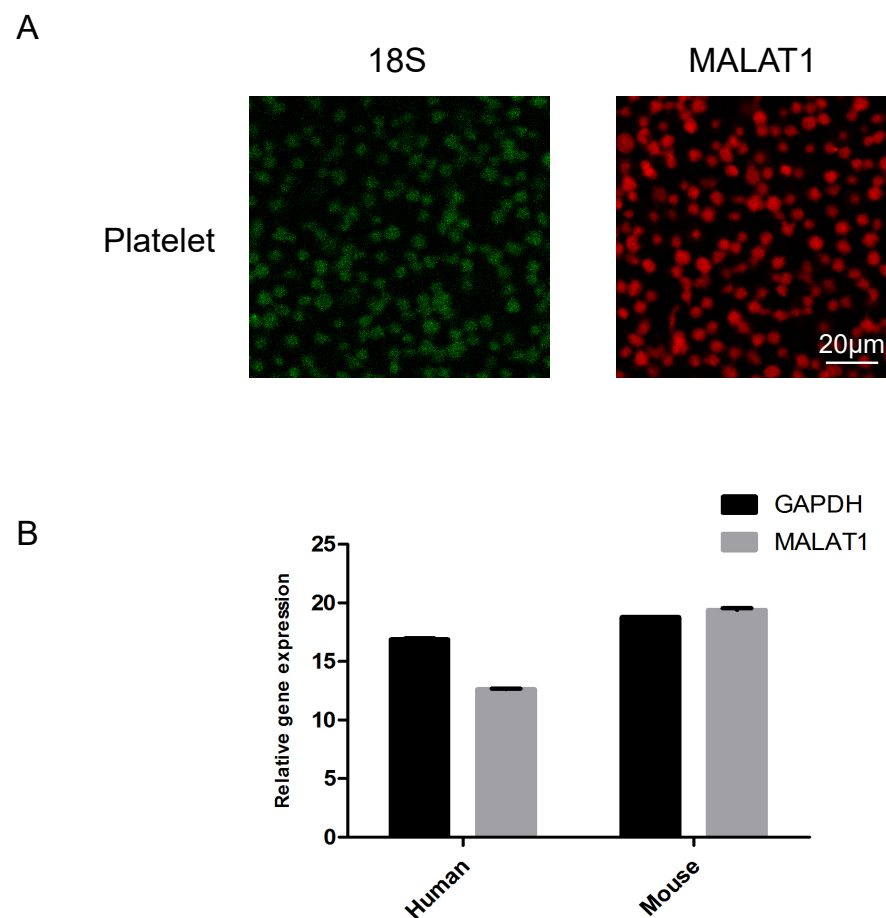

**Figure S1** MALAT1 is abundant in the human and mice platelet. (A) RNA FISH of MALAT1 and 18S in human platelets. Fluorescent signals are observed at platelets of human using 18S probe (green) and MALAT1 probe (red). (B) Relative MALAT1 expression in human and mice platelet was measured by RT-PCR. Y-axis represents the mean of CT value.

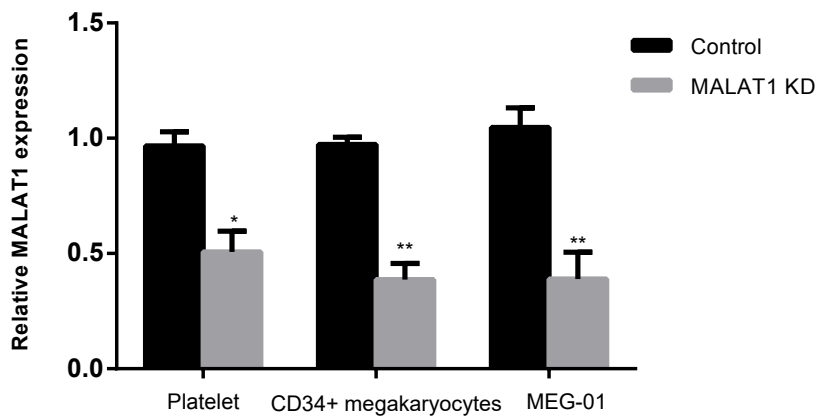

**Figure S2** Identification the expression of MALAT1 in MALAT KD platelets, CD34<sup>+</sup> megakaryocytes and MEG-01 cells by qRT-PCR. Data are mean±SD of 4 experiments (\* $P < 0.05$ , \*\* $P < 0.01$ ).

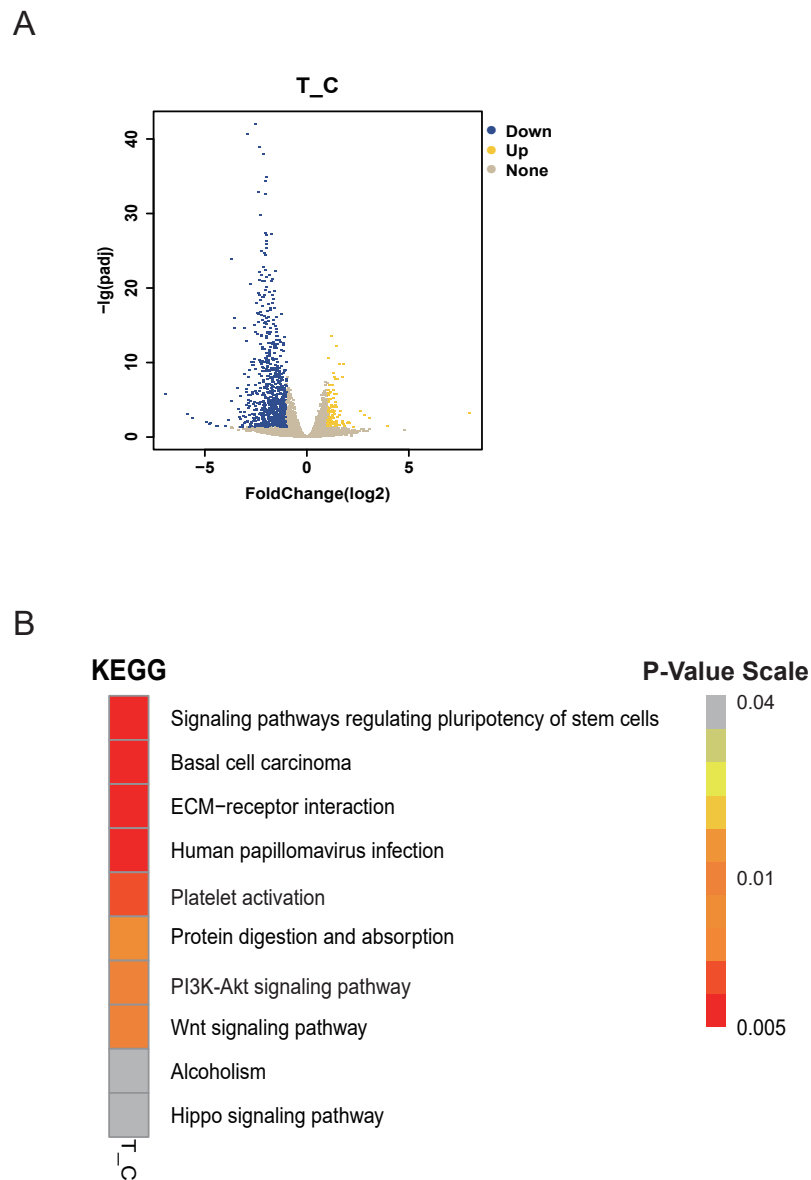

**Figure S3** Profiles of differentially expressed genes in MALAT1 KD MEG-01 cells (T group) and controls (C group). (A) Volcano plot of differentially expressed genes. Blue plots represent downexpressed genes, and yellow plots represent upexpressed genes with at least two-fold change and corrected P-value <0.05. (B) KEGG pathways analysis of differentially expressed genes.

**Table S1** Serum biochemistry parameters in mice

|                          | <b>Scramble(n=5)</b> | <b>MALAT1 KD(n=5)</b> | <b>P value</b> |
|--------------------------|----------------------|-----------------------|----------------|
| WBCs,10 <sup>9</sup> /L  | 6.316±0.534          | 7.052±0.928           | 0.5632         |
| LYs,10 <sup>9</sup> /L   | 3.93±0.276           | 3.784±0.311           | 0.30175        |
| MOs,10 <sup>9</sup> /L   | 0.618±0.102          | 0.546±0.124           | 0.2391         |
| EOs,10 <sup>9</sup> /L   | 0.02±0.00081         | 0.018±0.00066         | 0.2479         |
| RBCs,10 <sup>12</sup> /L | 9.354±1.203          | 8.718±1.768           | 0.3089         |
| MCV,fl                   | 49.72±6.31           | 48.94±4.56            | 0.4126         |
| MCH,Pg                   | 11.38±2.14           | 11.32±3.21            | 0.6034         |
| MCHC,g/L                 | 229.4±28.5           | 231.2±32.1            | 0.4932         |
| PLT,10 <sup>9</sup> /L   | 1079.6±160.2         | 1346.2±287.9          | 0.1981         |
| MPV,fl                   | 4.92±1.05            | 4.94±1.67             | 0.6234         |

WBCs, white blood cells; Lys, lymphocytes; MOs, monocytes; RBCs, red blood cells; MCV, mean corpuscular volume; MCH, mean corpuscular haemoglobin; MCHC, mean corpuscular haemoglobin concentration; PLT, platelets; MPV, mean platelet volume
